# 1 Demographic inference through 2 approximate-Bayesian-computation skyline 3 plots

4 Miguel Navascués<sup>1,2</sup>, Raphaël Leblois<sup>1,2</sup>, and Concetta Burgarella<sup>3</sup>

5 <sup>1</sup>INRA, UMR CBGP, F-34988 Montferrier-sur-Lez, France

6 <sup>2</sup>Institut de Biologie Computationnelle, F-34090 Montpellier, France

7 <sup>3</sup>IRD, UMR DIADE, F-34394 Montpellier, France

8 Corresponding author:

9 Miguel Navascués<sup>1</sup>

10 Email address: miguel.navascues@inra.fr

## 11 ABSTRACT

12 The skyline plot is a graphical representation of historical effective population sizes as a function of time.  
13 Past population sizes for these plots are estimated from genetic data, without *a priori* assumptions on  
14 the mathematical function defining the shape of the demographic trajectory. Because of this flexibility in  
15 shape, skyline plots can, in principle, provide realistic descriptions of the complex demographic scenarios  
16 that occur in natural populations. Currently, demographic estimates needed for skyline plots are estimated  
17 using coalescent samplers or a composite likelihood approach. Here, we provide a way to estimate  
18 historical effective population sizes using an Approximate Bayesian Computation (ABC) framework. We  
19 assess its performance using simulated and actual microsatellite datasets. Our method correctly retrieves  
20 the signal of contracting, constant and expanding populations, although the graphical shape of the plot is  
21 not always an accurate representation of the true demographic trajectory, particularly for recent changes  
22 in size and contracting populations. Because of the flexibility of ABC, similar approaches can be extended  
23 to other types of data, to multiple populations, or to other parameters that can change through time, such  
24 as the migration rate.

25 Inferring the historical demography of populations by means of genetic data is key to many studies  
26 addressing the ecological and evolutionary dynamics of natural populations. Population genetics infer-  
27 ence, with appropriate dating, can identify the likely factors (such as climatic events) determining the  
28 demography of a species. With enough research resources, this can be done with outstanding detail (e.g.  
29 in humans, reviewed in Nielsen et al., 2017). Demographic inference can also be used to generate null  
30 models for the detection of loci under selection (as discussed in Hoban et al., 2016).

31 At present, most of the methods to estimate demography from genetic data are based on the coalescent.  
32 The coalescent (see Wakeley, 2008, for a review) is a mathematical model that describes the rate at which  
33 genetic lineages coalesce (i.e. join in a common ancestor) towards the past, forming the genealogy of the  
34 sample. The coalescence probability depends on the effective population size at each time in the past, that  
35 is, the demographic history of the population. Given a genealogy, the coalescent enables a calculation of  
36 the likelihood of the demographic model. Demographic inference is obtained by calculating the likelihood  
37 of the model given the data, which requires integrating over all possible genealogies for the data. This is  
38 approximated by means of Monte Carlo algorithms known as coalescent samplers (see review by Kuhner,  
39 2009).

40 Alternatively, the coalescent can be used to calculate the likelihood of the number of genetic differences  
41 for a pair of gene copies under a given demographic model. The likelihood for all pairs in a sample  
42 can be combined to obtain a composite-likelihood (which is not a true likelihood because pairs are not  
43 independent and they are related by their genealogy). The composite-likelihood score can be used as  
44 a criterion to estimate the parameters of the model with faster algorithms than the coalescent samplers  
45 although with lower performance, particularly regarding confidence intervals (e.g. Navascués et al., 2009;  
46 Nikolic and Chevalet, 2014).

47 Coalescent models can also be used in the likelihood-free framework known as Approximate Bayesian  
48 Computation (ABC, Tavaré et al., 1997; Beaumont et al., 2002). In this approach, the likelihood is  
49 substituted by the similarity between the observed data and simulated data generated from a given model.  
50 Similarity is usually evaluated by means of a distance between observed and simulated summary statistics.  
51 This distance allows one to select the simulations close to the observed data and reject those too far  
52 away. Posterior probability distributions are estimated from the collection of parameter values used in the  
53 selected simulations (see Beaumont, 2010, for a review on ABC).

54 A classical way to address the estimation of past population size changes by these methods is to  
55 assume simple parametric models, such as exponential, logistic or instantaneous demographic change.  
56 However, these are sometimes considered too simple to describe the dynamics of real populations. In the  
57 skyline plot methods, the underlying demographic model is a piecewise constant population size model,  
58 i.e. the demographic history consists of several periods of constant size, with instantaneous changes of  
59 sizes between consecutive periods. The aim of this model is to provide a more flexible framework that  
60 could capture the complex demography expected in natural populations. Skyline plots were introduced  
61 by Pybus et al. (2000) who estimated the effective population size in the time intervals defined by the  
62 coalescent events of a given genealogy (which was considered as known) from the expected waiting time  
63 between coalescent events. The graphical representation of those estimates suggests the skyline of a city,  
64 giving the name to the method. Such models have been implemented in a Markov chain Monte Carlo  
65 coalescent sampler (BEAST software; Drummond et al., 2005; Minin et al., 2008; Heled and Drummond,  
66 2008), and in an importance sampling coalescent sampler (Ait Kaci Azzou et al., 2015) for the analysis of  
67 sequence data. The addition of microsatellite mutation models to BEAST (Wu and Drummond, 2011)  
68 made it possible to infer skyline plots from this type of data (e.g. Allen et al., 2012; Molfetti et al., 2013;  
69 Minhós et al., 2016). Also for microsatellite data, a composite-likelihood approach has been developed  
70 (R package VarEff Nikolic and Chevalet, 2014).

71 Similar piecewise models to infer historical population sizes through time have been proposed in the  
72 context of population genomics (e.g. Li and Durbin, 2011; Terhorst et al., 2016). The methods discussed  
73 above assume a set of independent (unlinked) genetic markers. However, if a large proportion of the  
74 genome has been sequenced, the studied polymorphisms are in linkage disequilibrium. Methods such  
75 as the Pairwise Sequentially Markovian Coalescent (PSMC, Li and Durbin, 2011) and its successors  
76 profit from the additional information of linkage disequilibrium for the inference. We will not further  
77 discuss this family of methods, as our focus here is on datasets of independent molecular markers, such as  
78 microsatellites, which remain reliable markers for low-budget projects. Note, however, the PSMC-like  
79 implementation on ABC by Boitard et al. (2016).

80 The use of the skyline plot in the ABC framework was first proposed in Burgarella et al. (2012). Here,  
81 we provide a suite of R scripts (DIYABCskylineplot) to produce approximate-Bayesian-computation  
82 skyline plots from microsatellite data and evaluate its performance on simulated pseudo-data. We show  
83 the method to be useful for detecting population decline and expansion and discuss its limits. ABC skyline  
84 plots are then built for four study cases (whale shark, leatherback turtle, Western black-and-white colobus  
85 and Temminck's red colobus) and compared with the demographic inference obtained by an alternative  
86 full likelihood method.

## 87 METHODS

### 88 ABC skyline plot

89 For a demographic skyline plot analysis within the ABC framework, our model consisted of a single  
90 population with constant size that instantaneously changes to a new size  $n$  times through time. The  
91 parameters (from present to past, as in the coalescent model) are the present scaled population size  
92  $\theta_0 = 4N_0\mu$  (where  $N_0$  is the effective population size in number of diploid individuals and  $\mu$  is the  
93 mutation rate per generation) which changes to  $\theta_1$  at time  $\tau_1 = T_1\mu$  (where  $T$  is the time measured in  
94 generations), remains at  $\theta_1$  and then it changes to  $\theta_2$  at  $\tau_2$ , and so on, until the last change to  $\theta_n$  at  $\tau_n$ .  
95 Note that other models and parametrization could have been used for our purpose, as in the alternative  
96 model that we present in the supplementary methods section S1.2.

97 The objective of a standard ABC analysis would be to estimate the posterior distribution for each  
98 parameter of the model. In our case, the parameters  $\{(\theta_i, \tau_i); i \in [0, n]\}$  have been treated as nuisance  
99 parameters and we focused on inferring from them the trajectory of the scaled effective population size  
100 along time,  $\theta(t)$ , as in Drummond et al. (2005). In order to approximate  $\theta(t)$  we select  $m$  times of

101 interest,  $\{t_j; j \in [1, m]\}$ . Given a simulation  $k$  with parameters  $\{(\theta_{k,i}, \tau_{k,i}); i \in [0, n_k]\}$ , derived parameters  
102  $\{\theta_k(t_j); j \in [1, m]\}$  are obtained as follows:  $\theta_k(t_j) = \theta_{k,i}$  for  $i$  satisfying the condition  $\tau_{k,i} \leq t_j < \tau_{k,i+1}$   
103 (see Supplementary Figure S1 for some examples). For each  $t_j$ , inference of the derived parameters  $\theta(t_j)$   
104 were obtained following standard ABC procedures as described elsewhere (e.g. Beaumont et al., 2002).  
105 Median and 95% highest posterior density (HPD) intervals of derived parameters  $\theta(t_j)$  were used to draw  
106 ABC skyline plots.

107 Simulations with different numbers of population size changes can be used for inference because of  
108 the use of derived parameters  $\theta(t_j)$ , which are common to all models. We set the prior probability on  
109 the number of constant size periods to be Poisson distributed with  $\lambda = \ln(2)$  as in Heled and Drummond  
110 (2008). This gives equal prior probability to stable populations (a single period of constant size) and  
111 changing populations (two or more periods). Thus, posterior probability on the number of periods may  
112 be used to discriminate between stable and changing demographics by estimating the Bayes factor of  
113 one period (constant population size) *versus* several demographic periods (variable population size).  
114 Posterior probabilities of contrasting models can be obtained by logistic regression as described elsewhere  
115 (Beaumont, 2008).

116 We implemented this approach in a suite of R scripts (R Core Team, 2017) that we named DIYABCsky-  
117 lineplot (Navascués, 2017). For each simulation the number of population size changes is sampled using  
118 the prior probabilities. Via command line version of DIYABC (v2.0, Cornuet et al., 2014), parameter val-  
119 ues,  $\{(\theta_{k,i}, \tau_{k,i}); i \in [0, n_k]\}$ , are sampled from the prior distribution, coalescent simulations are performed  
120 and summary statistics are calculated [mean across loci of the number of alleles,  $N_a$ ; heterozygosity,  $H_e$ ;  
121 variance of allele size,  $V_a$ , and Garza and Williamson (2001) statistic,  $M$ ]. In addition, the *Bottleneck*  
122 statistic ( $\Delta H$ ; Cornuet and Luikart, 1996), which compares the expected heterozygosity given the allele  
123 frequencies with the expected heterozygosity given the observed number of alleles, is calculated in R  
124 from the summary statistics provided by DIYABC. Derived parameter values,  $\{\theta_k(t_j); j \in [1, m]\}$ , are  
125 calculated from the reference table (i.e. table of original parameters and summary statistics values for all  
126 simulations) produced by DIYABC and their posterior probability distributions are estimated in R using  
127 the *abc* package (Csilléry et al., 2012).

## 128 Simulations

129 The method described above was evaluated on simulated data (pseudo observed data-set, POD) of  
130 contracting and expanding populations. Declining populations had a present effective size of  $N_0 = 100$   
131 diploid individuals that changed exponentially until time  $T$ , which had a value of 10, 50, 100 or 500  
132 generations in the past, reaching an ancestral population sizes of  $N_A$ , which had a value of 1000, 10 000  
133 or 100 000 individuals. Expanding populations had a present population size of  $N_0$  with a value of 1000,  
134 10 000 or 100 000 diploid individuals, which changed exponentially until reaching the size of the ancestral  
135 population  $N_A = 100$  at time  $T$ , which had a value of 10, 50, 100 or 500 generations in the past. For  
136 times older than  $T$ , the population size is constant at  $N_A$  for all scenarios. In addition, we simulated  
137 three constant population size scenarios with  $N$  taking a value of 1000, 10 000 or 100 000. Equivalent  
138 scenarios were also evaluated in Girod et al. (2011) and Leblois et al. (2014). PODs were generated for  
139 50 individuals genotyped at 30 microsatellite loci evolving under a generalised stepwise mutation model  
140 (GSM, Slatkin, 1995). Additional PODs varying in number of loci (7, 15 or 60 loci) and sample size  
141 (6, 12, 25 or 100 diploid individuals) were produced to evaluate the influence of the amount of data in  
142 the detection of demographic change. Mutation rate was set to  $\mu = 10^{-3}$  and  $P_{GSM}$  to 0, 0.22 or 0.74  
143 ( $P_{GSM}$  is the parameter of a geometric distribution determining the mutation size in number of repeats).  
144 One hundred replicates (i.e. PODs) were run for each scenario. Therefore, the mutation scaled parameter  
145 values are for  $\theta = 4N\mu$ : 0.4, 4, 40 or 400 and for  $\tau = T\mu$ : 0.01, 0.05, 0.1 or 0.5. PODs were obtained  
146 using the coalescent simulator fastsimcoal (Excoffier and Foll, 2011).

147 Every POD was analysed with the same set of prior probability distributions that largely includes  
148 all parameter values of simulations. Scaled effective size parameters,  $\theta_i$ , were taken from a log-uniform  
149 distribution in the range  $(10^{-3}, 10^4)$  and scaled times,  $\tau_i$ , from a log-uniform distribution in the range  
150  $(2.5 \times 10^{-4}, 4)$ . A uniform prior in the range (0,1) was used for mutational parameter  $P_{GSM}$ . For each  
151 replicate of each scenario, we obtained the skyline plot (median and 95%HPD intervals of the  $\theta(t_j)$   
152 posterior distributions) and estimated the Bayes factor between constant size and variable demography  
153 by using logistic regression. Estimates of the mutational parameter  $P_{GSM}$  were also obtained for each  
154 POD. For each scenario, mean absolute error, bias and proportion of times the true value falls outside the

155 credibility interval were estimated.

## 156 Data sets

157 In addition to PODs, four real data-sets from the literature were re-analysed with the ABC skyline plot  
158 described above. The first data-set comes from the whale shark (*Rhincodon typus*), the largest extant fish.  
159 Whale sharks inhabit all tropical and warm temperate seas and are considered an endangered species with  
160 a global population decline of more than 50% in the last three generations (Pierce and Norman, 2016).  
161 We have re-analysed a data-set of 478 individuals genotyped at 14 microsatellite loci from Vignaud et al.  
162 (2014b). The second example is the leatherback turtle (*Dermochelys coriacea*), the most widely distributed  
163 sea turtle found from tropical to sub-polar waters. The global population has been reduced in about  
164 40% in the last three generations. As species, the leatherback turtle is classified as vulnerable, mainly  
165 because of the Northwest Atlantic population that shows an increase in number of nests. However, other  
166 populations are critically endangered (Wallace et al., 2013). The data-set re-analysed (215 individuals  
167 genotypes at 10 microsatellite loci; Molfetti et al., 2013) comes from the Northwest Atlantic population.  
168 Last, we re-analysed the data from the populations of two colobus monkeys at the Cantanhez National  
169 Park in Guinea Bissau (Minhós et al., 2016). The Western black-and-white colobus (*Colobus polykomos*,  
170 22 individuals genotypes at 14 loci) and the Temminck's red colobus (*Procolobus badius* ssp. *temminckii*,  
171 23 individuals genotyped at 13 loci) are two sympatric species from the Western African rainforest  
172 considered to be vulnerable and endangered respectively (Oates et al., 2008; Galat-Luong et al., 2016).  
173 Data were analysed with the same prior distributions as PODs except for the colobus monkeys datasets,  
174 which consist of tetranucleotide markers. Previous evidence suggests that tetranucleotide microsatellite  
175 mutations are mainly of only one repeat unit (e.g. Leopoldino and Pena, 2003; Sun et al., 2012). In order  
176 to incorporate this prior knowledge, half of the simulations had  $P_{GSM} = 0$  (i.e. a strict stepwise mutation  
177 model, SMM) and the other half had the parameter sampled from a uniform distribution in the range (0,1).

178 For comparison, demographic history of the four real data sets was also explored using the MIGRAINE  
179 software (Rousset and Leblois, 2016, <http://kimura.univ-montp2.fr/~rousset/Migraine.htm>) under the  
180 model of a single panmictic population with an exponential change in population size. To infer model  
181 parameters, MIGRAINE uses coalescence-based importance sampling algorithms under a maximum  
182 likelihood framework (Leblois et al., 2014) using OnePopVarSize model. In this model, MIGRAINE  
183 estimates present and ancestral scaled population sizes ( $\theta_0 = 4N_0\mu$  and  $\theta_A = 4N_A\mu$ ) and the scaled time of  
184 occurrence of the past change in population size ( $D = T/4N$ , going backward from sampling time, when  
185 the population size change began). The past change in population size is deterministic and modelled using  
186 an exponential growth or decline that starts at time  $D$ . Before time  $D$ , scaled population size is stable and  
187 equal to  $\theta_A$ . MIGRAINE allows departure from the strict SMM by using a GSM with parameter  $P_{GSM}$  for  
188 the geometric distribution of mutation sizes. Finally, detection of significant past change in population size  
189 is based on the ratio of population size ( $\theta_{ratio} = \theta_0/\theta_A$ ).  $\theta_{ratio} > 1$  corresponds to a population expansion  
190 and  $\theta_{ratio} < 1$  to a bottleneck. If no significant demographic change is obtained, MIGRAINE is run again  
191 under a model of stable demography (a single value of  $\theta$ ) for parameter estimation. For the whale shark  
192 data set, MIGRAINE analysis was already done in Vignaud et al. (2014b). For the leatherback turtle,  
193 MIGRAINE was run using 20 000 trees, 200 points at each iteration and a total of 16 iterations. For the  
194 colobus monkeys, we considered 2 000 trees, 400 points at each iteration and a total of 8 iterations.

## 195 RESULTS

### 196 Simulations

197 The general behavior of the method can be described from three example scenarios (contraction with  
198  $\theta_0 = 0.4$ ,  $\theta_1 = 40$ ,  $\tau = 0.1$ , expansion with  $\theta_0 = 40$ ,  $\theta_1 = 0.4$ ,  $\tau = 0.1$  and constant size with  $\theta = 40$ ;  
199 mutational model with  $P_{GSM} = 0.22$ ). These examples correspond to intermediate parameter values.  
200 Results for all simulations are available in the supplementary material.

201 The main output of the analysis is the graphical representation (i.e. the skyline plot) of the inferred  
202 demographic trajectory. It consists of a plot with three curves, representing the point estimates (median)  
203 and 95%HPD intervals of  $\theta$  through time. Skyline plots obtained from PODs are congruent with the true  
204 underlying demography simulated (Figure 1), except in the less favorable scenarios with very recent or  
205 very small changes in population size (Supplementary Figures S2–S8). Although the trajectory of the  
206 posterior median of  $\theta$  and the true trajectory share the same trend (declining, increasing or constant), they  
207 sometimes differ in magnitude or time-scale. This disparity is more prominent for bottleneck scenarios.

208 For a quantitative criterion to assert demographic change we explored the value of posterior proba-  
209 bilities for constant and variable population size models, similar to the scheme proposed by Heled and  
210 Drummond (2008). These probabilities (summarised as Bayes factors in Figure 2) proved to be useful  
211 for distinguishing bottleneck and expansion scenarios from demographic stability, although with lower  
212 performance for less favorable scenarios (Supplementary Figures S9–S15). Constant size scenarios show  
213 no evidence for size change. The power to detect demographic change reduces with smaller sample size  
214 and lower number of loci (Figure 2) because summary statistics are estimated with lower precision.

215 Changes in population size were co-estimated with the mutational model parameter  $P_{GSM}$ . Mean  
216 absolute error, bias and proportion of replicates for which the true value was outside the 95%HPD interval  
217 are reported in Table 1 for the three example scenarios and in Table S1 for all simulations. Estimates  
218 from expanding and stable populations show a relatively low error and bias and a good coverage of the  
219 credibility interval (except in the strict SMM case). However, estimates from declining populations show  
220 higher error and bias.

## 221 Real Data

222 The ABC analyses show evidence of population expansion for the whale shark (BF=59.62) and the  
223 leatherback turtle (BF=16.65); no evidence for population size changes in the black-and-white colobus  
224 (BF=0.58) and some evidence for a bottleneck in the red colobus (BF=2.63). Respective skyline plots  
225 reflect such trends (Figure 3). Results from MIGRAINE support the same trends, with  $\theta_{ratio}$  significantly  
226 larger than one for the whale shark and the leatherback turtle, significantly smaller than one for the  
227 red colobus and not significantly different from one for the black-and-white colobus (Supplementary  
228 Table S3). Scaled population size estimates through time are also in agreement, except for the leatherback  
229 turtle, where the MIGRAINE result suggests a more ancestral expansion of much greater magnitude.

230 Regarding the mutational model, a large proportion of multi-step mutations seems to be present in  
231 all datasets, with  $P_{GSM}$  estimates:  $\hat{P}_{GSM} = 0.55$  (95%HPD=0.46–0.62) for the whale shark;  $\hat{P}_{GSM} = 0.50$   
232 (95%HPD=0.38–0.60) for the leatherback turtle;  $\hat{P}_{GSM} = 0.43$  (95%HPD= $4.05 \times 10^{-3}$ –0.53) for the black-  
233 and-white colobus; and  $\hat{P}_{GSM} = 0.18$  (95%HPD=0.02–0.75) for the red colobus (see also Supplementary  
234 Figure S16). Although very small values of  $P_{GSM}$  are included in the credibility interval from the  
235 colobus analyses, the GSM is favoured over the SMM when an ABC model choice analysis is performed  
236 (BF=57.50 for the black-and-white colobus and BF=10.01 for the red colobus). These results are congruent  
237 with estimates of  $P_{GSM}$  by MIGRAINE (Supplementary Table S3).

## 238 DISCUSSION

239 The ability of the ABC skyline plot to detect changes in population size varies largely across the different  
240 scenarios evaluated. The evidence for demographic change was often strong (even very strong) in  
241 declining and expanding populations. However, demographic changes of small magnitude and close  
242 to the present were the hardest to detect. Recent or small magnitude events leave a weak signal in the  
243 genetic data and are also hard to identify for alternative methods (see Girod et al., 2011; Leblois et al.,  
244 2014; Nikolic and Chevalet, 2014). In any case, the method is conservative, since most analyses of stable  
245 populations yielded negative or little evidence for demographic change.

246 The main appeal of skyline plots is to depict demographic trajectories not bounded by a mathematical  
247 function; thus, potentially reflecting more realistically the demography of natural populations. However,  
248 our results show that plotted trajectories only loosely reflect the true demography, particularly for  
249 contracting populations. The match between the true and inferred demographic trajectory was good for  
250 constant size populations and for some expanding populations. Ancestral and current population sizes  
251 (the extremes of the skyline plot) were also retrieved accurately for favourable scenarios. Nevertheless,  
252 the shape of the curve representing the transition between population sizes was a poor representation of  
253 the true demographic trajectory in many cases. While this conclusion is specific for the implementation  
254 presented in this work, it calls to caution for the interpretation of results from other methods yielding  
255 smooth skyline plots (e.g. Heled and Drummond, 2008; Gill et al., 2013; Nikolic and Chevalet, 2014).  
256 The key for a smooth skyline plot is the prior on the effective-size autocorrelation through time. The  
257 demographic history consists of several demographic periods. Within each period the effective size at  
258 consecutive generations is correlated through some mathematical function (often a constant). Between  
259 consecutive periods, population size can be independent (our approach) or correlated by different sets of  
260 priors. Drummond et al. (2005) proposed using an exponential prior for the effective size ( $\theta_i$ ) at period  $i$

261 with mean equal to the previous period effective size ( $\theta_{i-1}$ ). In the Bayesian skyride and skygrid (Minin  
262 et al., 2008; Gill et al., 2013) the correlation of effective size through time is modelled with a Gaussian  
263 Markov random field that penalizes differences in effective size across periods in function of the temporal  
264 distance among them. A superficial comparison with the VarEff method (Nikolic and Chevalet, 2014) and  
265 the extended Bayesian skyline plot (Heled and Drummond, 2008) seems to indicate that their inferences  
266 suffer from problems of performance (see Supplementary Figure S19).

267 Bottlenecked populations, which show the greatest discrepancy between the skyline plot and the  
268 true demographic curve, are also the scenarios for which the mutational parameter  $P_{GSM}$  was inferred  
269 with largest bias. Similar patterns of summary statistics are produced with large  $P_{GSM}$  values and with  
270 a bottleneck (e.g. large allele size variance, see Supplementary Table S2), which make accurate joint  
271 inference of demography and mutational models difficult. This difficulty of distinguishing between  
272 scenarios with frequent multi-step mutations and contracting populations also explains the low power  
273 to detect some bottleneck cases, such as those with large  $P_{GSM}$  values and strong declines in population  
274 size (see Supplementary Figures S11). A negative effect on demographic inference due to mutational  
275 model misspecification has been also reported for alternative methods (see Girod et al., 2011; Leblois  
276 et al., 2014; Nikolic and Chevalet, 2014).

277 Globally, our results highlight the interest of using complementary data and inference methods. In the  
278 four real-data populations, their demographies have been previously studied in the original publications.  
279 In addition to the MIGRAINE analysis of microsatellite data, Vignaud et al. (2014b) inferred a population  
280 expansion for the whale shark by using Bayesian skyline plot analysis on mitochondrial DNA sequence  
281 data, corroborating the signal of expansion for this species. In the case of the leatherback turtle, the  
282 previous analyses were less conclusive (Molfetti et al., 2013). An extended Bayesian skyline plot on  
283 microsatellite data suggested an expansion, but it was not significant, and the skyline plot on mitochondrial  
284 DNA data did not show any demographic change. In contrast, analysis of microsatellite data with  
285 MSVAR (a coalescent sampler approach, Beaumont, 1999; Storz and Beaumont, 2002) suggested a strong  
286 population decline. However, it must be noted that MSVAR assumes a strict SMM, which can lead to  
287 biases in the demographic estimates when microsatellite mutations include a substantial proportion of  
288 multi-step changes (Girod et al., 2011; Faurby and Pertoldi, 2012). Our estimates of the  $P_{GSM}$  parameter  
289 and the two-phase model used in BEAST suggest a strong departure from the SMM and lead us to favour  
290 the hypothesis of population expansion. Finally, the original analysis of the two colobus species found  
291 significant evidence of population decline for both of them (Minhós et al., 2016). Again, this evidence  
292 was obtained from MSVAR and the extended Bayesian skyline plot implemented in BEAST assuming a  
293 SMM. Despite the prior results suggesting that tetranucleotide microsatellite mutations add or remove a  
294 single repeat, our analyses (ABC skyline plot and MIGRAINE) rejected the SMM for the black-and-white  
295 colobus. This explains the difference between their results and our demographic inference, which supports  
296 a constant size for this population.

297 Results from demographic inferences have been reported in the form of the scaled parameters  $\theta$  and  $\tau$   
298 throughout this work. This is because rescaling to natural parameters (effective population size in number  
299 of individuals and time in number of generations or years) requires independent knowledge of mutation  
300 rates, which is unavailable for most species (including our four study cases). If such knowledge exists,  
301 a prior can be used in DIYABC to incorporate this information in the analysis and make inferences on  
302 natural scale parameters. Otherwise, we advocate reporting coalescent scaled parameters as results of the  
303 analysis. This allows the discussion of the result considering different mutation rates and reinterpretation  
304 of results if information on mutation rates is obtained in the future for the focal species.

305 A common problem for the inference of population size changes is the presence of population structure  
306 or gene flow. Most methods aiming to detect population size change often assume the analysis of a single,  
307 independent population, but violation of this assumption usually leads to false detection of bottlenecks  
308 (e.g. Heller et al., 2013; Nikolic and Chevalet, 2014, for skyline plot approaches). We expect the same  
309 effect in the implementation of the skyline plot analysis we present here. However, distinguishing between  
310 population structure and population decline in the ABC framework is possible under some circumstances  
311 with the appropriate summary statistics (Peter et al., 2010) that can be included in future implementations  
312 of the ABC skyline plot.

313 Indeed, the ease of incorporating new summary statistics and models is of prime interest for imple-  
314 menting the skyline plot in the ABC framework. Multiple samples of the same population at different  
315 times (as in experimental or monitored populations and ancient DNA studies) can easily be simulated

316 allowing for better estimates of the effective population size (Waples, 1989; Navascués et al., 2010).  
317 Models with multiple populations can also be simulated and skyline plots for each of the populations  
318 estimated. Extensions to other molecular markers will be straightforward to develop and already exist for  
319 genomic data (e.g. Boitard et al., 2016). Finally, other demographic parameters, such as the migration  
320 rate (Pool and Nielsen, 2009), could be subject to variation with time and they, too, could be inferred with  
321 a similar scheme. To sum up, there is potential to develop this approach in different directions, to address  
322 new questions in future research.

323 In this work we presented a detailed description of how to compute an approximate-Bayesian-  
324 computation skyline plot and assessed its performance on stable and changing simulated populations  
325 characterized with microsatellite markers. Its power to detect the signal of demographic change is similar  
326 to alternative methods. However, its potential ability to depict the demography of natural populations  
327 more realistically must not be overrated. Still it offers an analysis complementary to other methods and  
328 there is great potential to develop it to cover other models and types of genetic data.

## 329 ACKNOWLEDGMENTS

330 We thank Jean-Marie Cornuet and Renaud Vitalis for helpful discussion on this project and Alexandre  
331 Dehne-Garcia for his technical support. We thank Benoît de Thoisy and Tania Minhós for kindly sharing  
332 their data on the leatherback turtle and colobus monkeys respectively. Suggestions from two anonymous  
333 reviewers helped to improve this work and Ruth Hufbauer kindly revised and improved the English of the  
334 manuscript. All analyses were performed on the INRA MIGALE (<http://migale.jouy.inra.fr>), GENOTOU  
335 (Toulouse Midi-Pyrénées) and CBGP HPC bioinformatics platforms.

## 336 REFERENCES

- 337 Ait Kaci Azzou, S., Larribe, F., and Froda, S. (2015). A new method for estimating the demographic  
338 history from DNA sequences: an importance sampling approach. *Frontiers in Genetics*, 6:259.
- 339 Allen, J. M., Miyamoto, M. M., Wu, C.-H., E. Carter, T., Ungvari-Martin, J., Magrini, K., and Chapman,  
340 C. A. (2012). Primate DNA suggests long-term stability of an African rainforest. *Ecology and Evolution*,  
341 2(11):2829–2842.
- 342 Beaumont, M. A. (1999). Detecting population expansion and decline using microsatellites. *Genetics*,  
343 153(4):2013–2029.
- 344 Beaumont, M. A. (2008). Joint determination of topology, divergence time, and immigration in population  
345 trees. In Matsumura, S., Forster, P., and Renfrew, C., editors, *Simulation, Genetics, and Human*  
346 *Prehistory*, McDonald Institute Monographs, pages 135–154. McDonald Institute for Archaeological  
347 Research, Cambridge.
- 348 Beaumont, M. A. (2010). Approximate Bayesian computation in evolution and ecology. *Annual Review*  
349 *of Ecology, Evolution, and Systematics*, 41(1):379–406.
- 350 Beaumont, M. A., Zhang, W., and Balding, D. J. (2002). Approximate Bayesian computation in population  
351 genetics. *Genetics*, 162(4):2025–2035.
- 352 Boitard, S., Rodríguez, W., Jay, F., Mona, S., and Austerlitz, F. (2016). Inferring population size history  
353 from large samples of genome-wide molecular data - an approximate Bayesian computation approach.  
354 *PLOS Genetics*, 12(3):e1005877.
- 355 Burgarella, C., Navascués, M., Zabal-Aguirre, M., Berganzo, E., Riba, M., Mayol, M., Vendramin, G. G.,  
356 and González-Martínez, S. C. (2012). Recent population decline and selection shape diversity of  
357 taxol-related genes. *Molecular Ecology*, 21(12):3006–3021.
- 358 Cornuet, J. M. and Luikart, G. (1996). Description and power analysis of two tests for detecting recent  
359 population bottlenecks from allele frequency data. *Genetics*, 144(4):2001–2014.
- 360 Cornuet, J.-M., Pudlo, P., Veyssier, J., Dehne-Garcia, A., Gautier, M., Leblois, R., Marin, J.-M., and  
361 Estoup, A. (2014). DIYABC v2.0: a software to make approximate Bayesian computation inferences  
362 about population history using single nucleotide polymorphism, DNA sequence and microsatellite data.  
363 *Bioinformatics*, 30(8):1187–1189.
- 364 Csilléry, K., François, O., and Blum, M. G. B. (2012). abc: an R package for approximate Bayesian  
365 computation (ABC). *Methods in Ecology and Evolution*, 3(3):475–479.
- 366 Drummond, A. J., Rambaut, A., Shapiro, B., and Pybus, O. G. (2005). Bayesian coalescent inference of

- 367 past population dynamics from molecular sequences. *Molecular Biology and Evolution*, 22(5):1185–  
368 1192.
- 369 Excoffier, L. and Foll, M. (2011). fastsimcoal: a continuous-time coalescent simulator of genomic  
370 diversity under arbitrarily complex evolutionary scenarios. *Bioinformatics*, 27(9):1332–1334.
- 371 Faurby, S. and Pertoldi, C. (2012). The consequences of the unlikely but critical assumption of stepwise  
372 mutation in the population genetic software, MSVAR. *Evolutionary Ecology Research*, 14(7):859–879.
- 373 Galat-Luong, A., Galat, G., Oates, J., Struhsaker, T., McGraw, S., and Ting, N. (2016). *Ptilocolobus*  
374 *temminckii*. In *The IUCN Red List of Threatened Species 2016*, page e.T18247A92646945.
- 375 Garza, J. C. and Williamson, E. G. (2001). Detection of reduction in population size using data from  
376 microsatellite loci. *Molecular Ecology*, 10(2):305–318.
- 377 Gill, M. S., Lemey, P., Faria, N. R., Rambaut, A., Shapiro, B., and Suchard, M. A. (2013). Improving  
378 Bayesian population dynamics inference: A coalescent-based model for multiple loci. *Molecular*  
379 *Biology and Evolution*, 30(3):713–724.
- 380 Girod, C., Vitalis, R., Leblois, R., and Fréville, H. (2011). Inferring population decline and expansion from  
381 microsatellite data: A simulation-based evaluation of the msvar method. *Genetics*, 188(1):165–179.
- 382 Heled, J. and Drummond, A. J. (2008). Bayesian inference of population size history from multiple loci.  
383 *BMC Evolutionary Biology*, 8(1):289.
- 384 Heller, R., Chikhi, L., and Siegmund, H. R. (2013). The confounding effect of population structure on  
385 Bayesian skyline plot inferences of demographic history. *PLoS ONE*, 8(5):e62992.
- 386 Hoban, S., Kelley, J. L., Lotterhos, K. E., Antolin, M. F., Bradburd, G., Lowry, D. B., Poss, M. L., Reed,  
387 L. K., Storfer, A., and Whitlock, M. C. (2016). Finding the genomic basis of local adaptation: Pitfalls,  
388 practical solutions, and future directions. *The American Naturalist*, 188(4):379–397.
- 389 Jeffreys, H. (1961). *Theory of Probability*. Oxford University Press, Oxford, 3rd edition.
- 390 Kuhner, M. K. (2009). Coalescent genealogy samplers: windows into population history. *Trends in*  
391 *Ecology & Evolution*, 24(2):86–93.
- 392 Leblois, R., Pudlo, P., Néron, J., Bertaux, F., Beeravolu, C. R., Vitalis, R., and Rousset, F. (2014).  
393 Maximum-likelihood inference of population size contractions from microsatellite data. *Molecular*  
394 *Biology and Evolution*, 31(10):2805–2823.
- 395 Leopoldino, A. M. and Pena, S. D. J. (2003). The mutational spectrum of human autosomal tetranucleotide  
396 microsatellites. *Human Mutation*, 21(1):71–79.
- 397 Li, H. and Durbin, R. (2011). Inference of human population history from individual whole-genome  
398 sequences. *Nature*, 475(7357):493–496.
- 399 Minhós, T., Chikhi, L., Sousa, C., Vicente, L. M., Ferreira da Silva, M., Heller, R., Casanova, C., and  
400 Bruford, M. W. (2016). Genetic consequences of human forest exploitation in two colobus monkeys in  
401 Guinea Bissau. *Biological Conservation*, 194:194–208.
- 402 Minin, V. N., Bloomquist, E. W., and Suchard, M. A. (2008). Smooth skyride through a rough skyline:  
403 Bayesian coalescent-based inference of population dynamics. *Molecular Biology and Evolution*,  
404 25(7):1459–1471.
- 405 Molfetti, E., Torres Vilaça, S., Georges, J.-Y., Plot, V., Delcroix, E., Le Scao, R., Lavergne, A., Barrioz,  
406 S., dos Santos, F. R., and de Thoisy, B. (2013). Recent demographic history and present fine-scale  
407 structure in the Northwest Atlantic leatherback (*Dermochelys coriacea*) turtle population. *PLoS ONE*,  
408 8(3):e58061.
- 409 Navascués, M. (2017). DIYABCskylineplot v1.0.1: A suite of R scripts to perform a Approximate  
410 Bayesian Computation Skyline Plot. doi:10.5281/zenodo.267182.
- 411 Navascués, M., Depaulis, F., and Emerson, B. C. (2010). Combining contemporary and ancient DNA in  
412 population genetic and phylogeographical studies. *Molecular Ecology Resources*, 10:760–772.
- 413 Navascués, M., Hardy, O., and Burgarella, C. (2009). Characterization of historical demographic  
414 expansions from pairwise comparisons of haplotypes using linked microsatellites. *Genetics*, 181(3):1013–  
415 1019.
- 416 Nielsen, R., Akey, J. M., Jakobsson, M., Pritchard, J. K., Tishkoff, S., and Willerslev, E. (2017). Tracing  
417 the peopling of the world through genomics. *Nature*, 541(7637):302–310.
- 418 Nikolic, N. and Chevalet, C. (2014). Detecting past changes of effective population size. *Evolutionary*  
419 *Applications*, 7(6):663–681.
- 420 Oates, J., Gippoliti, S., and Groves, C. (2008). *Colobus polykomos*. In *The IUCN Red List of Threatened*  
421 *Species 2008*, page e.T5144A11116648.



- 422 Peter, B. M., Wegmann, D., and Excoffier, L. (2010). Distinguishing between population bottleneck and  
423 population subdivision by a Bayesian model choice procedure. *Molecular Ecology*, 19(21):4648–4660.
- 424 Pierce, S. and Norman, B. (2016). *Rhincodon typus*. In *The IUCN Red List of Threatened Species 2016*,  
425 page e.T19488A2365291.
- 426 Pool, J. E. and Nielsen, R. (2009). Inference of historical changes in migration rate from the lengths of  
427 migrant tracts. *Genetics*, 181(2):711–719.
- 428 Pybus, O. G., Rambaut, A., and Harvey, P. H. (2000). An integrated framework for the inference of viral  
429 population history from reconstructed genealogies. *Genetics*, 155(3):1429–1437.
- 430 R Core Team (2017). *R: A Language and Environment for Statistical Computing*. R Foundation for  
431 Statistical Computing, Vienna, Austria.
- 432 Rousset, F. and Leblois, R. (2016). MIGRAINE version 0.5.
- 433 Slatkin, M. (1995). A measure of population subdivision based on microsatellite allele frequencies.  
434 *Genetics*, 139(1):457–462.
- 435 Storz, J. F. and Beaumont, M. A. (2002). Testing for genetic evidence of population expansion and  
436 contraction: an empirical analysis of microsatellite DNA variation using a hierarchical bayesian model.  
437 *Evolution*, 56(1):154.
- 438 Sun, J. X., Helgason, A., Masson, G., Ebenesersdóttir, S. S., Li, H., Mallick, S., Gnerre, S., Patterson, N.,  
439 Kong, A., Reich, D., and Stefansson, K. (2012). A direct characterization of human mutation based on  
440 microsatellites. *Nature Genetics*, 44(10):1161–1165.
- 441 Tavaré, S., Balding, D. J., Griffiths, R. C., and Donnelly, P. (1997). Inferring coalescence times from  
442 DNA sequence data. *Genetics*, 145(2):505–518.
- 443 Terhorst, J., Kamm, J. A., and Song, Y. S. (2016). Robust and scalable inference of population history  
444 from hundreds of unphased whole genomes. *Nature Genetics*, advanced online.
- 445 Vignaud, T. M., Maynard, J. A., Leblois, R., Meekan, M. G., Vázquez-Juárez, R., Ramírez-Macías, D.,  
446 Pierce, S. J., Rowat, D., Berumen, M. L., Beeravolu, C., Baksay, S., and Planes, S. (2014a). Data from:  
447 Genetic structure of populations of whale sharks among ocean basins and evidence for their historic  
448 rise and recent decline. Dryad Digital Repository. doi:10.5061/dryad.489s0.
- 449 Vignaud, T. M., Maynard, J. A., Leblois, R., Meekan, M. G., Vázquez-Juárez, R., Ramírez-Macías, D.,  
450 Pierce, S. J., Rowat, D., Berumen, M. L., Beeravolu, C., Baksay, S., and Planes, S. (2014b). Genetic  
451 structure of populations of whale sharks among ocean basins and evidence for their historic rise and  
452 recent decline. *Molecular Ecology*, 23(10):2590–2601.
- 453 Wakeley, J. (2008). *Coalescent Theory: An Introduction*. Roberts & Company Publishers.
- 454 Wallace, B., Tiwari, M., and Girondot, M. (2013). *Dermochelys coriacea*. In *The IUCN Red List of*  
455 *Threatened Species 2013*, page e.T6494A43526147.
- 456 Waples, R. S. (1989). A generalized approach for estimating effective population size from temporal  
457 changes in allele frequency. *Genetics*, 121(2):379–391.
- 458 Wu, C.-H. and Drummond, A. J. (2011). Joint inference of microsatellite mutation models, population  
459 history and genealogies using transdimensional Markov chain Monte Carlo. *Genetics*, 188(1):151  
460 –164.

## 461 DATA ACCESSIBILITY

462 Code for DIYABCskylineplot is available on ZENODO (doi:10.5281/zenodo.267182) and on GitHub  
463 (<http://github.com/mnavascues/DIYABCskylineplot>) including code to automatically simulate pseudo-  
464 data. Data from whale sharks is available at DRYAD database (Vignaud et al., 2014a).

## 465 AUTHOR CONTRIBUTIONS

466 MN and CB conceived and designed the work. MN developed the code. MN, RL and CB analysed the  
467 data and discussed the results. MN and RL wrote the article. All authors read and approved the final  
468 manuscript.

## 469 TABLES AND FIGURES

**Table 1. Estimation of mutational parameter  $P_{GSM}$**

| model         | $\theta_0$ | $\theta_1$ | $\tau$ | $P_{GSM}$ | MAE  | bias  | out of CI |
|---------------|------------|------------|--------|-----------|------|-------|-----------|
| contraction   | 0.4        | 40         | 0.1    | 0.22      | 0.14 | 0.13  | 0.01      |
| expansion     | 40         | 0.4        | 0.1    | 0.22      | 0.05 | -0.04 | 0.05      |
| constant size | 40         |            |        | 0.22      | 0.06 | -0.03 | 0.00      |

MAE: mean absolute error; out of CI: proportion outside credibility interval (95%HPD). Estimates from 100 replicates.

**Figure 1. ABC Skyline plots: simulations.** Superimposed skyline plots (median in black, and 95%HPD interval in grey) of the posterior probability distribution for  $\theta(t)$  from 100 replicates for example (A) contraction ( $\theta_0 = 0.4$ ,  $\theta_1 = 40$ ,  $\tau = 0.1$ ), (B) expansion ( $\theta_0 = 40$ ,  $\theta_1 = 0.4$ ,  $\tau = 0.1$ ) and (C) constant size ( $\theta = 40$ ) scenarios with mutational model  $P_{GSM} = 0.22$ . Simulation of 30 loci sampled at 50 diploid individuals. True demography is shown in orange. Note that present is at  $\tau = 0$  (left).

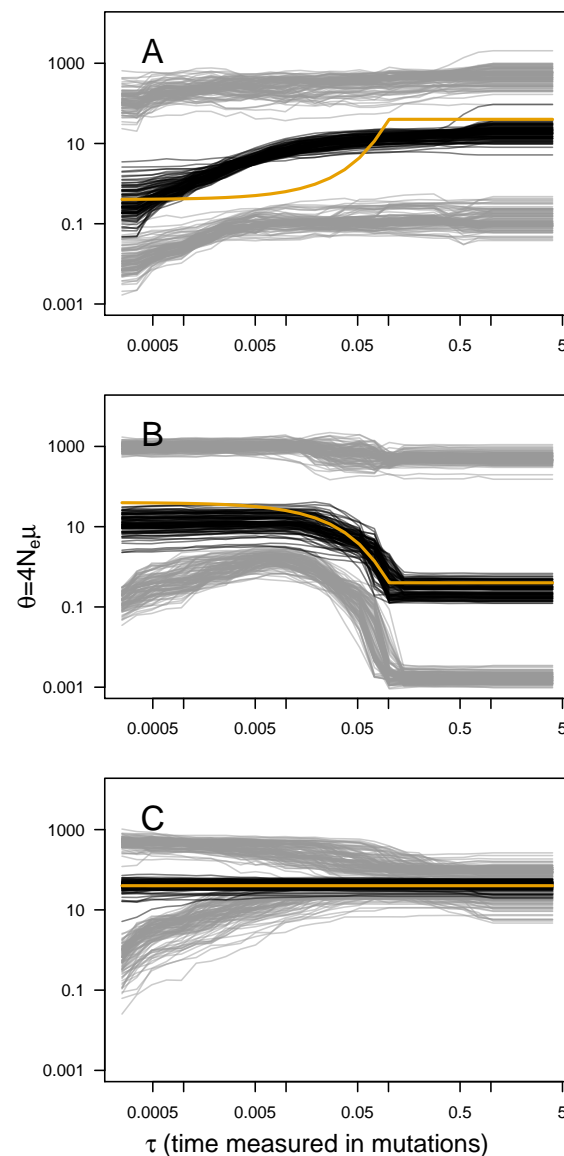

**Figure 2. Evidence for variable population size.** Distribution of Bayes factor values (boxplot) from 100 replicates for example (A,D) contraction ( $\theta_0 = 0.4$ ,  $\theta_1 = 40$ ,  $\tau = 0.1$ ), (B,E) expansion ( $\theta_0 = 40$ ,  $\theta_1 = 0.4$ ,  $\tau = 0.1$ ) and (C,F) constant size ( $\theta = 40$ ) scenarios with mutational model  $P_{GSM} = 0.22$ . Different sized data sets (number of individuals and loci) are presented, with simulation of 30 loci (A,B,C) and simulation with 50 diploid individuals (D,E,F). For reference, Jeffreys (1961) scale is given for the evidence against constant size.

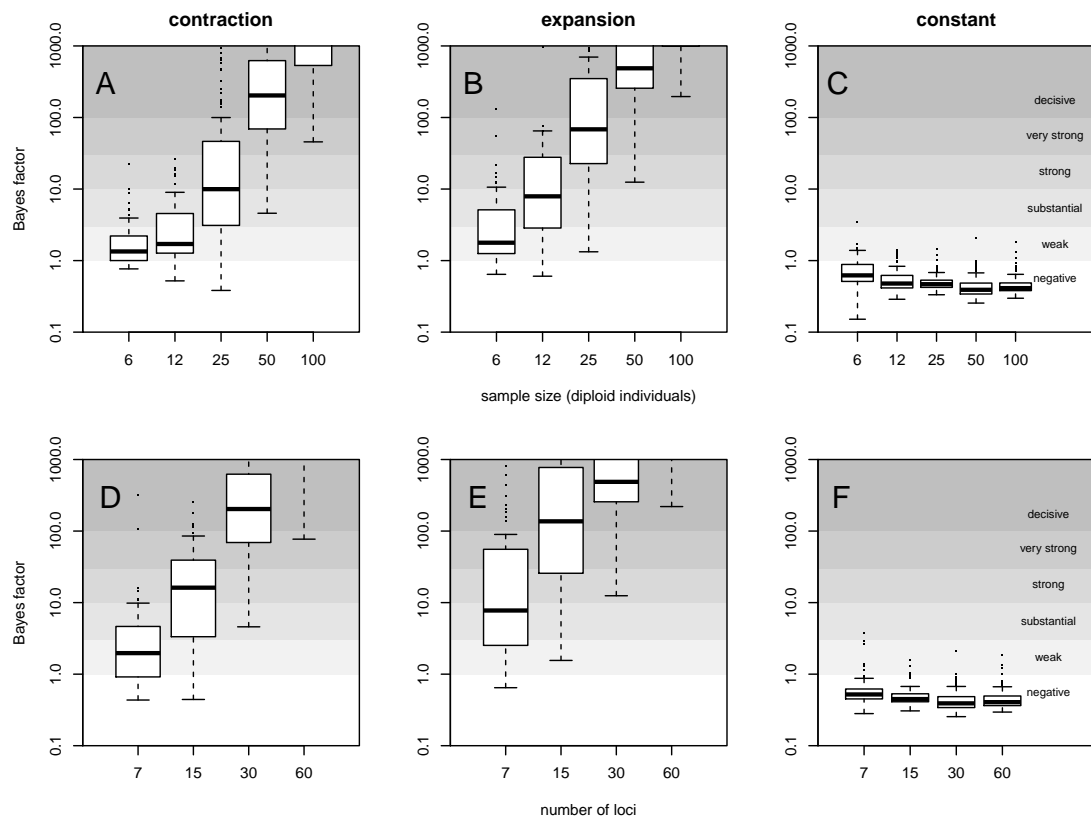

**Figure 3. ABC Skyline plots: real data.** Skyline plots (median in black, and 95%HPD interval in grey of the posterior probability distribution for  $\theta(t)$ ) for whale shark (A), leatherback turtle (B), Western black-and-white colobus (C) and Temminck's red colobus (D). Bayes Factors (BF) are reported for the variable *versus* constant size model. Demographic trajectories based on parameters point estimates from MIGRAINE analysis are shown with a green line for reference. Note that present is  $\tau = 0$  (left).

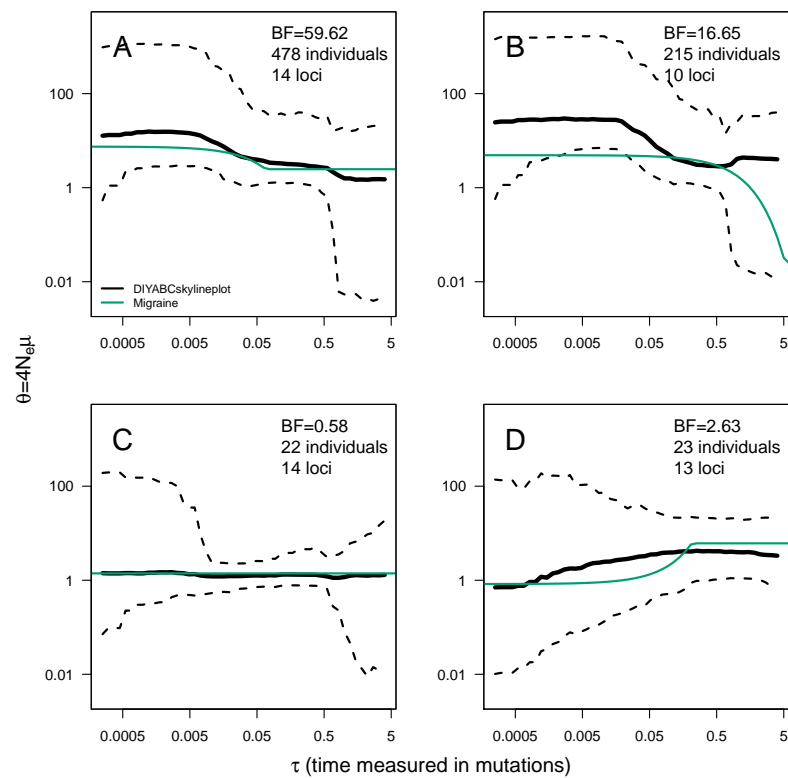

Source: http://www.biorxiv.org/content/10.1101/112060v4.full.pdf
